# Supplementary material
Source: PubMed Central journal article supplement (PMC2773700)
Supplement: NIHMS144556-supplement-1_si_001.pdf [file NIHMS144556-supplement-1_si_001.pdf]

# Supporting Information

ja-2009-039373

## Importance of Ligand Reorganization Free Energy in Protein-Ligand Binding-Affinity Prediction

*Chao-Yie Yang, Haiying Sun, Jianyong Chen, Zaneta Nikolovska-Coleska and Shaomeng*

*Wang\**

Departments of Internal Medicine, Pharmacology and Medicinal Chemistry, Comprehensive Cancer Center and Center for Computational Medicine and Bioinformatics, University of Michigan, 1500 E. Medical Center Drive, Ann Arbor, MI 48109, USA

**Table S1.** List of crystal structures used in Figure 2.

| PDB ID | Reference | Ligand in the binding site                                                           | Resolution (Å) |
|--------|-----------|--------------------------------------------------------------------------------------|----------------|
| 1G73   | 1         | Ala-Val-Pro-Ile                                                                      | 2.00           |
| 1NW9   | 2         | Ala-Thr-Pro-Phe                                                                      | 2.40           |
| 2JK7   | 3         | 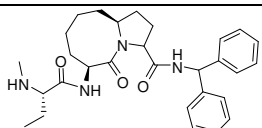   | 2.82           |
| 2OPY   | 4         |    | 2.80           |
| 2OPZ   | 4         | Ala-Val-Pro-Phe                                                                      | 3.00           |
| 2VSL   | 5         |    | 2.10           |
| 3CLX   | 6         |   | 2.70           |
| 3CM2   | 6         |  | 2.50           |
| 3CM7   | 6         |  | 3.10           |

**Table S2.** Binding affinity estimates based on different protein-ligand conformation selection criteria and scoring functions. The unit for RT ln(K<sub>i</sub>) is kcal/mol. Scores from X-Score is kcal/mol. Scores from Drugscore and M-Score are dimensionless in which more negative values correspond to higher potencies. SD stands for standard deviation.

| Pose selection<br>Compound | Dock                    |         | Lowest Score |         | Ensemble (1ns) |            |         |         | SD   | Drugscore  | SD       | M-Score | SD    |
|----------------------------|-------------------------|---------|--------------|---------|----------------|------------|---------|---------|------|------------|----------|---------|-------|
|                            | RT ln (K <sub>i</sub> ) | X-Score | Drugscore    | M-Score | X-Score        | Drugscore  | M-Score | X-Score |      |            |          |         |       |
| 1                          | -8.92                   | -7.27   | -416688.00   | -151.88 | -8.45          | -497309.00 | -207.40 | -7.90   | 0.27 | -455056.51 | 23772.16 | -177.34 | 16.08 |
| 2                          | -7.30                   | -7.48   | -426793.00   | -182.80 | -8.43          | -467966.00 | -215.88 | -7.81   | 0.36 | -426141.29 | 20164.95 | -184.80 | 16.42 |
| 3                          | -6.65                   | -7.37   | -428925.00   | -145.84 | -8.23          | -441610.00 | -196.39 | -7.69   | 0.29 | -409691.95 | 19760.11 | -155.89 | 16.89 |
| 4                          | -7.66                   | -7.23   | -440399.00   | -168.85 | -8.31          | -466304.00 | -191.47 | -7.63   | 0.33 | -424092.44 | 21224.96 | -161.30 | 12.77 |
| 5                          | -7.31                   | -7.45   | -399940.00   | -138.50 | -8.15          | -442246.00 | -186.98 | -7.47   | 0.28 | -405678.93 | 21477.72 | -148.31 | 16.68 |
| 6                          | -8.04                   | -7.37   | -452325.00   | -145.67 | -8.63          | -491495.00 | -194.73 | -8.14   | 0.29 | -450089.66 | 23226.78 | -157.81 | 18.20 |
| 7                          | -9.08                   | -7.33   | -459131.00   | -143.83 | -8.38          | -479915.00 | -173.67 | -7.70   | 0.30 | -434931.29 | 22488.78 | -142.22 | 16.63 |
| 8                          | -9.20                   | -7.43   | -442339.00   | -158.77 | -8.52          | -474017.00 | -181.25 | -7.86   | 0.30 | -434758.66 | 21671.54 | -150.76 | 13.34 |
| 9                          | -7.24                   | -6.52   | -419361.00   | -185.30 | -7.63          | -388564.00 | -213.12 | -6.99   | 0.28 | -357985.59 | 23893.30 | -182.68 | 14.07 |
| 10                         | -9.31                   | -7.88   | -477814.00   | -156.64 | -8.24          | -498394.00 | -199.37 | -7.82   | 0.26 | -450065.76 | 21364.42 | -177.84 | 13.37 |
| 11                         | -10.40                  | -8.01   | -459274.00   | -144.72 | -8.61          | -542015.00 | -222.30 | -7.85   | 0.33 | -460683.83 | 31151.62 | -187.94 | 18.48 |
| 12                         | -10.30                  | -7.24   | -486725.00   | -180.44 | -8.42          | -514874.00 | -220.60 | -7.97   | 0.26 | -479616.29 | 20458.77 | -182.53 | 16.61 |
| 13                         | -8.08                   | -6.89   | -471099.00   | -177.63 | -8.40          | -505112.00 | -207.54 | -6.74   | 0.57 | -373538.44 | 47114.53 | -178.12 | 14.54 |
| 14                         | -5.69                   | -7.18   | -444296.00   | -163.31 | -8.19          | -483143.00 | -203.77 | -7.65   | 0.28 | -427269.12 | 27380.52 | -177.00 | 12.70 |
| 15                         | -9.68                   | -7.39   | -473666.00   | -169.74 | -8.70          | -513764.00 | -217.77 | -8.16   | 0.25 | -467610.44 | 23495.53 | -186.35 | 17.79 |
| 16                         | -7.34                   | -7.46   | -439710.00   | -135.57 | -8.67          | -533195.00 | -221.49 | -8.25   | 0.24 | -485782.98 | 22524.76 | -179.39 | 22.18 |
| 17                         | -5.82                   | -7.31   | -468412.00   | -140.24 | -8.91          | -521847.00 | -193.38 | -8.35   | 0.29 | -481086.10 | 19303.20 | -163.86 | 14.39 |
| 18                         | -8.81                   | -6.25   | -354290.00   | -177.12 | -8.66          | -532402.00 | -241.75 | -8.00   | 0.25 | -475203.95 | 24669.26 | -207.10 | 16.55 |
| 19                         | -9.31                   | -8.31   | -405320.00   | -147.81 | -8.75          | -499577.00 | -204.70 | -8.11   | 0.26 | -456651.73 | 18873.14 | -176.86 | 13.63 |
| 20                         | -10.35                  | -8.25   | -491799.00   | -209.36 | -8.77          | -570451.00 | -238.78 | -8.17   | 0.31 | -494060.22 | 29602.31 | -209.42 | 16.76 |
| 21                         | -10.50                  | -7.37   | -492148.00   | -176.17 | -9.36          | -591848.00 | -242.99 | -8.28   | 0.47 | -496076.41 | 43229.06 | -200.71 | 20.79 |
| 22                         | -11.47                  | -7.87   | -503021.00   | -207.21 | -9.20          | -540905.00 | -273.17 | -8.26   | 0.32 | -493203.85 | 27584.53 | -213.81 | 24.71 |
| 23                         | -9.79                   | -7.71   | -481055.00   | -168.03 | -8.68          | -575214.00 | -245.04 | -8.21   | 0.26 | -504054.80 | 26403.78 | -210.45 | 20.26 |
| 24                         | -9.11                   | -7.95   | -540218.00   | -205.93 | -8.81          | -514034.00 | -232.71 | -8.13   | 0.30 | -459025.90 | 24405.49 | -197.86 | 14.79 |
| 25                         | -10.72                  | -7.74   | -474838.00   | -201.93 | -8.72          | -501082.00 | -224.43 | -8.19   | 0.25 | -457798.22 | 23781.09 | -193.82 | 17.28 |
| 26                         | -11.28                  | -7.54   | -514372.00   | -240.79 | -8.90          | -531202.00 | -258.72 | -8.28   | 0.24 | -492984.90 | 23880.09 | -224.51 | 17.35 |
| 27                         | -11.02                  | -7.50   | -496308.00   | -227.32 | -8.99          | -570804.00 | -261.20 | -8.26   | 0.33 | -508496.98 | 32550.38 | -215.98 | 20.50 |
| 28                         | -10.26                  | -7.41   | -503721.00   | -201.51 | -8.76          | -543175.00 | -263.72 | -8.31   | 0.22 | -498580.68 | 19282.05 | -225.62 | 14.24 |
| 29                         | -8.41                   | -7.54   | -519222.00   | -203.63 | -8.54          | -526968.00 | -245.23 | -8.08   | 0.24 | -480823.46 | 22154.50 | -204.20 | 21.44 |
| 30                         | -9.20                   | -7.58   | -482779.00   | -220.36 | -9.09          | -548060.00 | -269.99 | -8.36   | 0.38 | -483624.95 | 34965.43 | -230.00 | 21.25 |
| 31                         | -8.51                   | -7.52   | -431416.00   | -148.71 | -8.49          | -480940.00 | -191.07 | -7.77   | 0.29 | -440792.05 | 14864.24 | -160.06 | 15.20 |

**Table S3.** Binding affinity calculations based on the MM-GBSA method. Numbers in parentheses are standard deviations. The standard deviation of  $\Delta G$  is calculated as the squared root of the sum of squares of standard deviations of  $\Delta H$  and T $\Delta S$ .

| Compound | RT ln (Ki) | $\Delta G$ (elec) | $\Delta G$ (vdw) | $\Delta H$   | T $\Delta S$ | $\Delta G$    | $\Delta G + \delta\Delta G_{re}$ |
|----------|------------|-------------------|------------------|--------------|--------------|---------------|----------------------------------|
| 1        | -8.92      | -190.29(11.87)    | -35.13(2.34)     | -41.83(3.45) | -20.47(6.52) | -21.36 (7.38) | -19.07                           |
| 2        | -7.30      | -198.25(13.37)    | -33.53(3.86)     | -40.27(4.33) | -22.15(3.02) | -18.12(5.28)  | -15.30                           |
| 3        | -6.65      | -189.07(15.22)    | -32.99(2.65)     | -39.05(3.26) | -21.19(3.10) | -17.86(4.50)  | -13.44                           |
| 4        | -7.66      | -183.74(10.89)    | -35.08(3.42)     | -40.35(3.30) | -23.62(3.87) | -16.73(5.09)  | -15.10                           |
| 5        | -7.31      | -192.86(13.55)    | -32.27(3.21)     | -38.14(3.39) | -21.83(3.34) | -16.31(4.76)  | -14.87                           |
| 6        | -8.04      | -168.79(12.59)    | -37.08(2.93)     | -42.12(2.92) | -20.69(3.96) | -21.43(4.92)  | -19.82                           |
| 7        | -9.08      | -203.59(12.86)    | -34.90(3.32)     | -41.74(2.43) | -20.60(4.32) | -21.14(4.96)  | -19.57                           |
| 8        | -9.20      | -193.53(10.20)    | -35.89(3.09)     | -42.57(3.18) | -23.03(5.44) | -19.54(6.30)  | -17.68                           |
| 9        | -7.24      | -208.43(17.96)    | -29.61(3.51)     | -34.59(3.16) | -21.56(5.16) | -13.03(6.05)  | -14.88                           |
| 10       | -9.31      | -175.92(10.68)    | -33.70(3.19)     | -39.80(3.09) | -23.49(2.87) | -18.58(4.22)  | -17.44                           |
| 11       | -10.40     | -169.61(15.74)    | -36.89(3.76)     | -41.14(3.62) | -23.01(2.57) | -21.07(4.44)  | -20.91                           |
| 12       | -10.30     | -186.03(13.84)    | -40.95(3.24)     | -46.60(2.76) | -23.19(3.58) | -23.41(4.52)  | -22.29                           |
| 13       | -8.08      | -197.50(10.29)    | -29.43(4.61)     | -36.47(5.03) | -20.07(4.14) | -16.4(6.52)   | -16.10                           |
| 14       | -5.69      | -186.58(13.63)    | -32.93(3.08)     | -38.29(3.75) | -23.14(6.10) | -15.15(5.59)  | -13.22                           |
| 15       | -9.68      | -201.62(11.93)    | -38.25(2.56)     | -46.51(3.43) | -25.61(2.79) | -20.9(4.42)   | -20.86                           |
| 16       | -7.34      | -173.76(12.98)    | -40.43(3.24)     | -45.84(4.33) | -25.00(3.18) | -20.84(5.37)  | -19.17                           |
| 17       | -5.82      | -195.79(13.67)    | -41.24(3.37)     | -45.71(4.37) | -25.88(5.02) | -19.83(6.66)  | -16.63                           |
| 18       | -8.81      | -177.37(9.96)     | -39.98(2.86)     | -44.34(3.01) | -23.26(2.60) | -21.08(3.98)  | -16.49                           |
| 19       | -9.31      | -204.44(13.08)    | -35.42(3.11)     | -43.77(3.08) | -21.30(4.66) | -22.47(5.59)  | -19.31                           |
| 20       | -10.35     | -195.38(10.27)    | -38.68(3.57)     | -45.78(2.89) | -19.46(3.09) | -22.71(4.23)  | -22.11                           |
| 21       | -10.50     | -284.60(25.43)    | -40.69(3.35)     | -44.58(3.99) | -26.26(7.10) | -18.32(8.15)  | -18.38                           |
| 22       | -11.47     | -184.86(17.09)    | -39.92(3.47)     | -46.39(3.00) | -24.41(3.08) | -22.62(4.30)  | -19.13                           |
| 23       | -9.79      | -187.15(12.74)    | -42.42(2.34)     | -47.27(3.34) | -21.99(5.54) | -25.28(6.47)  | -20.04                           |
| 24       | -9.11      | -200.61(12.91)    | -37.47(2.97)     | -42.39(3.02) | -20.85(3.01) | -21.54(4.26)  | -18.07                           |
| 25       | -10.72     | -188.07(14.59)    | -37.12(2.68)     | -43.89(2.87) | -22.53(3.73) | -21.36(4.71)  | -19.59                           |
| 26       | -11.28     | -181.18(14.33)    | -41.33(3.40)     | -46.20(3.67) | -24.09(3.58) | -22.11(5.13)  | -23.03                           |
| 27       | -11.02     | -173.25(15.64)    | -42.32(3.22)     | -50.52(3.51) | -24.81(5.07) | -25.71(6.17)  | -23.78                           |
| 28       | -10.26     | -193.51(9.83)     | -40.91(2.56)     | -49.18(3.48) | -22.08(4.42) | -27.1(5.63)   | -19.81                           |
| 29       | -8.41      | -179.37(11.99)    | 38.92(2.90)      | -44.87(3.30) | -19.77(3.00) | -25.1(4.46)   | -17.25                           |
| 30       | -9.20      | -191.77(12.33)    | -39.81(3.83)     | -44.76(4.26) | -22.76(4.33) | -22.49(6.08)  | -19.15                           |
| 31       | -8.51      | -201.11(9.55)     | -37.06(2.35)     | -44.76(2.67) | -23.10(4.14) | -21.66(4.93)  | -18.73                           |
| 32       | -8.34      | -184.12(12.31)    | -40.88(3.26)     | -45.24(3.85) | -24.85(6.38) | -20.84(7.45)  | -19.14                           |
| 33       | -7.68      | -182.9(10.95)     | -40.89(3.02)     | -45.71(2.88) | -23.40(2.85) | -22.31 (4.05) | -17.40                           |
| 34       | -8.96      | -182.96(12.09)    | -42.22(2.44)     | -44.23(3.20) | -27.26(2.56) | -16.97(4.10)  | -18.29                           |
| 35       | -7.54      | -181.39(9.88)     | -40.45(3.26)     | -45.85(3.11) | -22.80(3.50) | -23.05(4.68)  | -14.08                           |
| 36       | -8.52      | -195.62(11.50)    | -40.73(3.72)     | -45.10(3.42) | -24.86(2.83) | -20.24(4.44)  | -15.21                           |
| 37       | -9.35      | -176.64(9.81)     | -44.67(2.88)     | -49.56(3.61) | -25.06(3.85) | -24.5(5.28)   | -17.22                           |
| 38       | -9.49      | -177.22(9.85)     | -45.48(3.34)     | -50.97(3.22) | -22.81(5.39) | -28.16(6.28)  | -21.13                           |
| 39       | -8.08      | -198.00(11.60)    | -42.93(2.92)     | -49.45(3.28) | -24.01(3.32) | -25.44(4.67)  | -17.80                           |
| 40       | -9.11      | -180.67(11.33)    | -42.85(3.35)     | -50.24(2.96) | -23.96(4.26) | -26.28(5.19)  | -20.32                           |
| 41       | -9.17      | -241.85(12.82)    | -38.01(3.71)     | -44.79(3.64) | -19.96(5.47) | -24.83(6.57)  | -20.92                           |

**Table S4.** Ligand reorganization free energy upon binding ( $\delta\Delta G_{re}$ ) calculated using trajectories from the 1 ns protein-ligand complex simulations. The protein-free ligand simulations were performed for 10 ns. The number of rotatable bonds is calculated by a utility program in X-Score.

| Compound | RT ln(Ki) | $\delta\Delta G_{re}$ | $\delta\Delta H_{re}$ | $\delta\Delta T\Delta S_{re}$ | # of rotatable bonds |
|----------|-----------|-----------------------|-----------------------|-------------------------------|----------------------|
| 1        | -8.92     | 2.29                  | 3.62                  | 1.33                          | 7                    |
| 2        | -7.30     | 2.82                  | 4.21                  | 1.39                          | 5                    |
| 3        | -6.65     | 4.42                  | 5.12                  | 0.70                          | 7                    |
| 4        | -7.66     | 1.63                  | 2.97                  | 1.34                          | 9                    |
| 5        | -7.31     | 1.44                  | 2.15                  | 0.71                          | 7                    |
| 6        | -8.04     | 1.61                  | 2.52                  | 0.91                          | 7                    |
| 7        | -9.08     | 1.57                  | 2.44                  | 0.87                          | 7                    |
| 8        | -9.20     | 1.86                  | 3.36                  | 1.50                          | 7                    |
| 9        | -7.24     | -1.85                 | -1.99                 | -0.14                         | 5                    |
| 10       | -9.31     | 1.14                  | 2.51                  | 1.37                          | 8                    |
| 11       | -10.40    | 0.16                  | 1.69                  | 1.53                          | 8                    |
| 12       | -10.30    | 1.12                  | 1.40                  | 0.28                          | 9                    |
| 13       | -8.08     | 0.30                  | -0.03                 | -0.33                         | 8                    |
| 14       | -5.69     | 1.93                  | 3.13                  | 1.20                          | 8                    |
| 15       | -9.68     | 0.03                  | 1.35                  | 1.31                          | 8                    |
| 16       | -7.34     | 1.67                  | 2.76                  | 1.09                          | 8                    |
| 17       | -5.82     | 3.20                  | 4.06                  | 0.86                          | 9                    |
| 18       | -8.81     | 4.59                  | 5.24                  | 0.65                          | 7                    |
| 19       | -9.31     | 3.16                  | 3.55                  | 0.39                          | 5                    |
| 20       | -10.35    | 0.60                  | 1.07                  | 0.47                          | 7                    |
| 21       | -10.50    | -0.08                 | -0.11                 | -0.05                         | 7                    |
| 22       | -11.47    | 3.08                  | 4.26                  | 0.77                          | 7                    |
| 23       | -9.79     | 5.24                  | 5.83                  | 0.59                          | 8                    |
| 24       | -9.11     | 3.47                  | 3.47                  | 0.00                          | 5                    |
| 25       | -10.72    | 1.77                  | 3.37                  | 1.60                          | 5                    |
| 26       | -11.28    | -0.92                 | 0.15                  | 1.07                          | 7                    |
| 27       | -11.02    | 1.93                  | 2.81                  | 0.88                          | 9                    |
| 28       | -10.26    | 7.29                  | 8.30                  | 1.01                          | 7                    |
| 29       | -8.41     | 7.85                  | 8.44                  | 0.59                          | 7                    |
| 30       | -9.20     | 3.34                  | 4.73                  | 1.39                          | 5                    |
| 31       | -8.51     | 2.93                  | 4.34                  | 1.41                          | 9                    |

**Table S5.** Average radius of gyration (Rg) of the ligands in protein-bound and protein-free (10ns) conformations. SD is standard deviation.

| Compound #     | Rg(bound) | STD  | Rg(free) | STD  | $\Delta$ Rg(bound-free) |
|----------------|-----------|------|----------|------|-------------------------|
| 1              | 4.60      | 0.07 | 4.08     | 0.24 | 0.52                    |
| 2              | 4.56      | 0.10 | 3.94     | 0.19 | 0.62                    |
| 3              | 4.20      | 0.05 | 3.92     | 0.12 | 0.28                    |
| 4              | 4.50      | 0.06 | 4.04     | 0.15 | 0.46                    |
| 5              | 4.16      | 0.05 | 3.89     | 0.12 | 0.27                    |
| 6              | 4.68      | 0.08 | 4.22     | 0.19 | 0.46                    |
| 7              | 4.34      | 0.11 | 3.99     | 0.16 | 0.35                    |
| 8              | 4.56      | 0.08 | 4.04     | 0.16 | 0.52                    |
| 9              | 4.04      | 0.06 | 4.08     | 0.11 | -0.05                   |
| 10             | 4.73      | 0.14 | 4.18     | 0.28 | 0.56                    |
| 11             | 5.04      | 0.61 | 4.38     | 0.11 | 0.66                    |
| 12             | 4.89      | 0.06 | 4.48     | 0.12 | 0.41                    |
| 13             | 4.50      | 0.27 | 4.45     | 0.29 | 0.05                    |
| 14             | 4.66      | 0.13 | 4.22     | 0.36 | 0.45                    |
| 15             | 4.64      | 0.07 | 4.16     | 0.17 | 0.49                    |
| 16             | 4.60      | 0.08 | 4.24     | 0.18 | 0.36                    |
| 17             | 4.48      | 0.21 | 4.23     | 0.23 | 0.25                    |
| 18             | 4.86      | 0.06 | 4.25     | 0.13 | 0.60                    |
| 19             | 4.56      | 0.08 | 4.03     | 0.18 | 0.54                    |
| 20             | 4.95      | 0.06 | 4.48     | 0.17 | 0.47                    |
| 21             | 4.89      | 0.06 | 4.90     | 0.12 | 0.00                    |
| 22             | 5.07      | 0.07 | 4.81     | 0.14 | 0.26                    |
| 23             | 4.98      | 0.05 | 4.57     | 0.17 | 0.41                    |
| 24             | 4.47      | 0.06 | 4.22     | 0.19 | 0.25                    |
| 25             | 4.84      | 0.05 | 4.28     | 0.16 | 0.56                    |
| 26             | 5.05      | 0.05 | 4.68     | 0.23 | 0.37                    |
| 27             | 4.95      | 0.09 | 4.70     | 0.19 | 0.25                    |
| 28             | 5.01      | 0.07 | 4.41     | 0.11 | 0.60                    |
| 29             | 4.89      | 0.05 | 4.36     | 0.08 | 0.53                    |
| 30             | 4.93      | 0.06 | 4.25     | 0.11 | 0.68                    |
| 31             | 4.51      | 0.06 | 4.02     | 0.09 | 0.49                    |
| <b>Average</b> | 4.68      | 0.10 | 4.22     | 0.19 | 0.41                    |

**Table S6.** Intercepts and slopes of the linear regression in the leave-one-out analyses. The parameters were calculated using  $R^7$  based on 30 data points.

| Compound # | $\Delta G$ |        | $\Delta G + \delta \Delta G_{re}$ |        |
|------------|------------|--------|-----------------------------------|--------|
|            | intercept  | slope  | intercept                         | slope  |
| 1          | -9.4508    | 1.2462 | -5.8410                           | 1.4073 |
| 2          | -9.5924    | 1.2349 | -6.0756                           | 1.3867 |
| 3          | -9.4430    | 1.2495 | -6.4957                           | 1.3436 |
| 4          | -9.9407    | 1.2029 | -6.1753                           | 1.3781 |
| 5          | -10.0516   | 1.1906 | -6.1865                           | 1.3760 |
| 6          | -9.1871    | 1.2713 | -5.4671                           | 1.4416 |
| 7          | -9.4725    | 1.2453 | -5.8508                           | 1.4051 |
| 8          | -9.4745    | 1.2516 | -5.8613                           | 1.4117 |
| 9          | -10.9140   | 1.1065 | -6.1712                           | 1.3773 |
| 10         | -9.4367    | 1.2600 | -5.8388                           | 1.4157 |
| 11         | -8.8347    | 1.3333 | -5.9303                           | 1.3981 |
| 12         | -9.6402    | 1.2236 | -6.1502                           | 1.3676 |
| 13         | -9.9321    | 1.2070 | -6.0274                           | 1.3931 |
| 14         | -10.2337   | 1.1676 | -6.2105                           | 1.3712 |
| 15         | -9.4359    | 1.2531 | -5.9523                           | 1.3921 |
| 16         | -8.9275    | 1.2991 | -5.1250                           | 1.4784 |
| 17         | -7.9061    | 1.4086 | -4.5578                           | 1.5422 |
| 18         | -9.4468    | 1.2472 | -5.9495                           | 1.4042 |
| 19         | -9.4997    | 1.2384 | -5.8690                           | 1.4053 |
| 20         | -9.5294    | 1.2390 | -6.1248                           | 1.3714 |
| 21         | -8.7283    | 1.3464 | -5.4646                           | 1.4606 |
| 22         | -9.1019    | 1.2929 | -4.9253                           | 1.5241 |
| 23         | -9.7625    | 1.2005 | -5.8951                           | 1.4021 |
| 24         | -9.4703    | 1.2442 | -5.8694                           | 1.4088 |
| 25         | -9.1697    | 1.2863 | -5.5803                           | 1.4442 |
| 26         | -9.0575    | 1.2989 | -6.2449                           | 1.3592 |
| 27         | -10.1116   | 1.1651 | -6.4747                           | 1.3291 |
| 28         | -10.1683   | 1.1501 | -5.7933                           | 1.4169 |
| 29         | -8.9590    | 1.2849 | -5.9086                           | 1.4038 |
| 30         | -9.4802    | 1.2400 | -5.8641                           | 1.4058 |
| 31         | -9.3388    | 1.2557 | -5.7853                           | 1.4126 |

Figure S1. (A) Backbone RMSD of XIAP BIR3 with a reference to XIAP BIR3 in the crystal structure between Smac and XIAP BIR3 from a 9 ns simulation. The alignments are based on residues from R285 to D309 where the Smac peptide binds, P315 to P325 and R285 to D309 respectively. The black lines are a 20-point running average. (B) Alignment of XIAP BIR3 between Smac-bound crystal structure (grey color) and the final conformation (green color) from the 9 ns simulation.

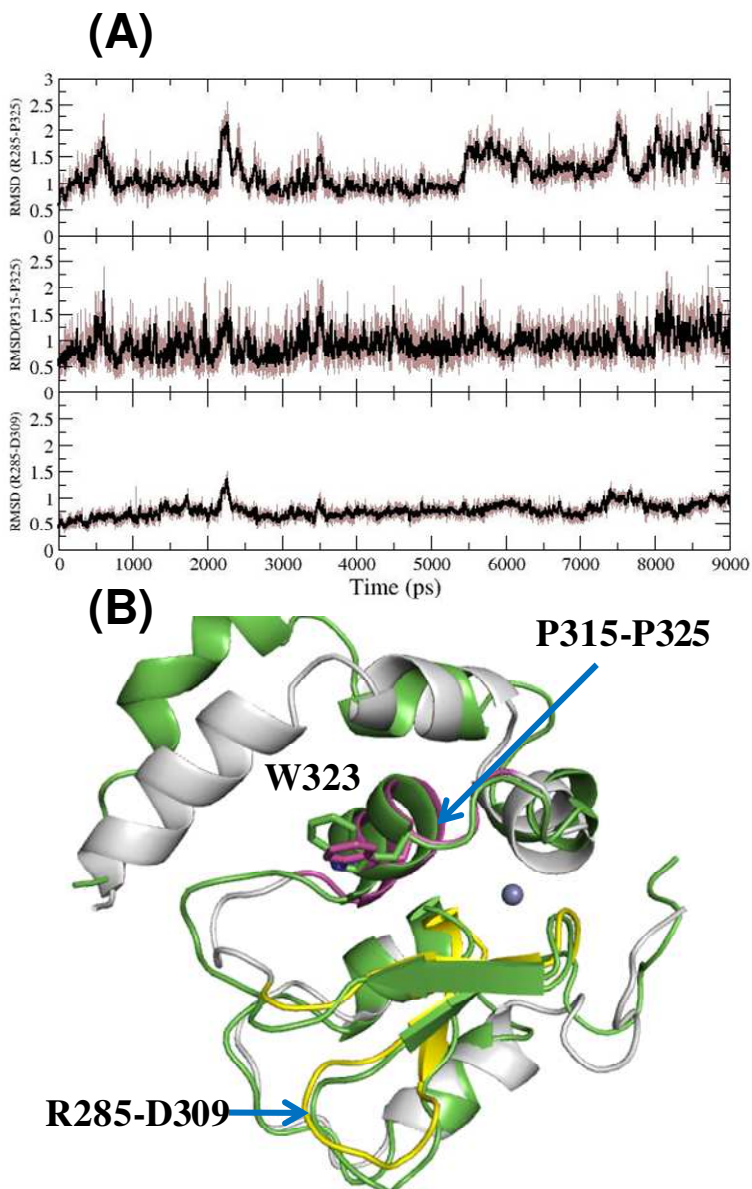



**References:**

- (1) Wu, G.; Chai, J.; Suber, T. L.; Wu, J.-W.; Du, C.; Wang, X.; Shi, Y. *Nature* **2000**, *408*, 1008-1012.
- (2) Shiozaki, E. N.; Chai, J.; Rigotti, D. J.; Riedl, S. J.; Li, P.; Srinivasula, S. M.; Alnemri, E. S.; Fairman, R.; Shi, Y. *Mol Cell* **2003**, *11*, 519-27.
- (3) Sun, H.; Stuckey, J. A.; Nikolovska-Coleska, Z.; Qin, D.; Meagher, J. L.; Qiu, S.; Lu, J.; Yang, C.-Y.; Saito, N. G.; Wang, S. *Journal of Medicinal Chemistry* **2008**, *51*, 7169-7180.
- (4) Wist, A. D.; Gu, L.; Riedl, S. J.; Shi, Y.; McLendon, G. L. *Bioorg Med Chem* **2007**, *15*, 2935-43.
- (5) Nikolovska-Coleska, Z.; Meagher, J. L.; Jiang, S.; Yang, C. Y.; Qiu, S.; Roller, P. P.; Stuckey, J. A.; Wang, S. *Biochemistry* **2008**, *47*, 9811-24.
- (6) Mastrangelo, E.; Cossu, F.; Milani, M.; Sorrentino, G.; Lecis, D.; Delia, D.; Manzoni, L.; Drago, C.; Seneci, P.; Scolastico, C.; Rizzo, V.; Bolognesi, M. *Journal of Molecular Biology* **2008**, *384*, 673-689.
- (7) Team, R. D. C.; R Foundation for Statistical Computing: Vienna, Austria, 2009.

**Complete references of 17 and 20.**

- (17) Case, D. A.; Darden, T. A.; Cheatham III, T. E.; Simmerling, C. L.; Wang, J.; Duke, R. E.; Luo, R.; Merz, K. M.; Wang, B.; Pearlman, D. A.; Crowley, M.; Brozell, S.; Tsui, V.; Gohlke, H.; Mongan, J.; Hornak, V.; Cui, G.; Beroza, P.; Schafmeister, C.; Caldwell, J. W.; Ross, W. S.; Kollman, P. A. University of California, San Francisco, 2004.

(20) Frisch, M. J.; Trucks, G. W.; Schlegel, H. B.; Scuseria, G. E.; Robb, M. A.; Cheeseman, J. R.; Zakrzewski Jr., V. G.; Montgomery, J. A.; Stratmann, R. E.; Burant, J. C.; Dapprich, S.; Millam, J. M.; Daniels, A. D.; Kudin, K. N.; Strain, M. C.; Farkas, O.; Tomasi, J.; Barone, V.; Cossi, M.; Cammi, R.; Mennucci, B.; Pomelli, C.; Adamo, C.; Clifford, S.; Ochterski, J.; Petersson, G. A.; Ayala, P. Y.; Cui, Q.; Morokuma, K.; Malick, D. K.; Rabuck, A. D.; Raghavachari, K.; Foresman, J. B.; Cioslowski, J.; Ortiz, J. V.; Baboul, A. G.; Stefanov, B. B.; Liu, G.; Liashenko, A.; Piskorz, P.; Komaromi, I.; Gomperts, R.; Martin, R. L.; Fox, D. J.; Keith, T.; Al-Laham, M. A.; Peng, C. Y.; Nanayakkara, A.; Challacombe, M.; Gill, P. M.; Johnson, B.; Chen, W.; Wong, M. M.; Andres, J. L.; Gonzalez, C.; Head-Gordon, M.; Replogle, E. S.; Pople, J. A.; Gaussian, Inc.: Pittsburgh PA, 2001.
